# Supplementary material
Source: PubMed Central journal article supplement (PMC7095149)

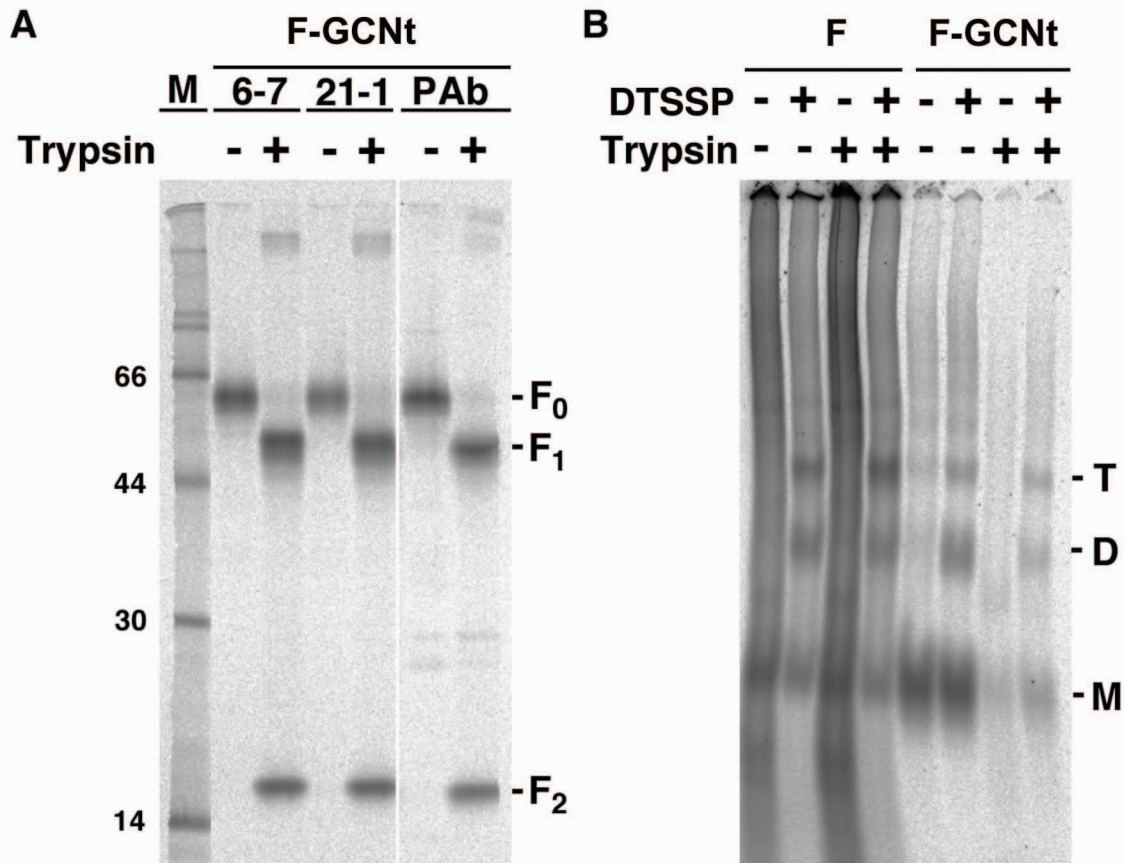

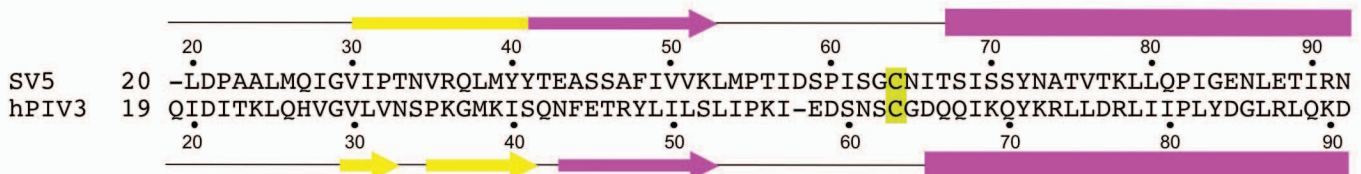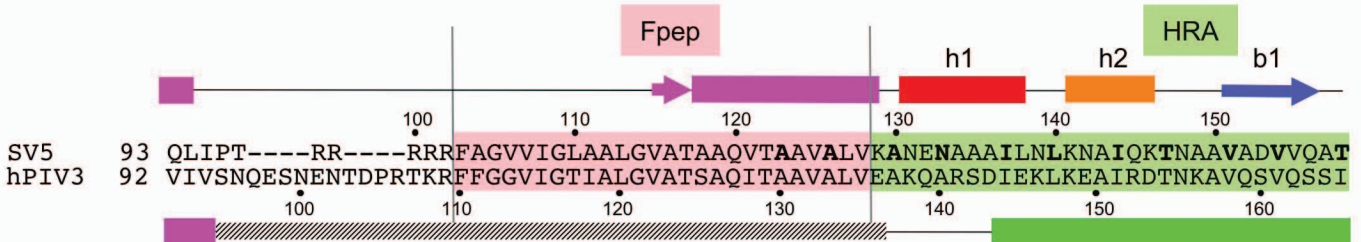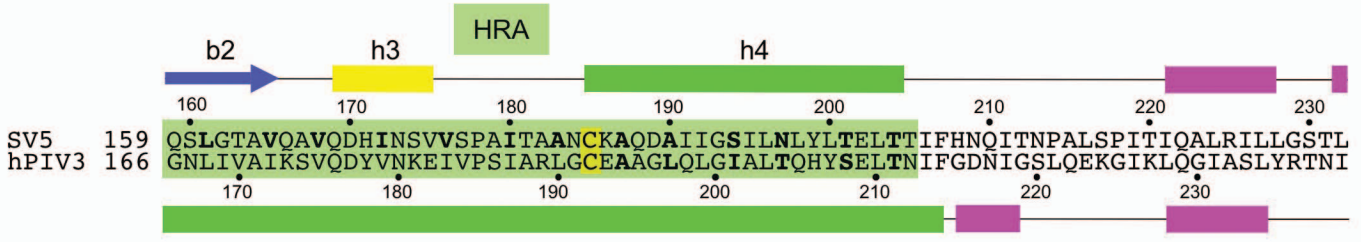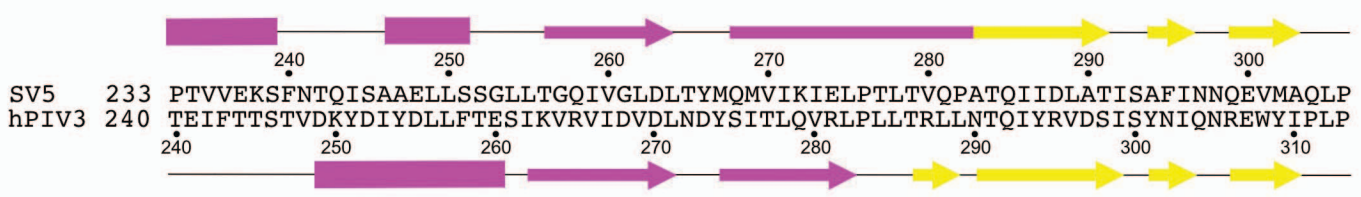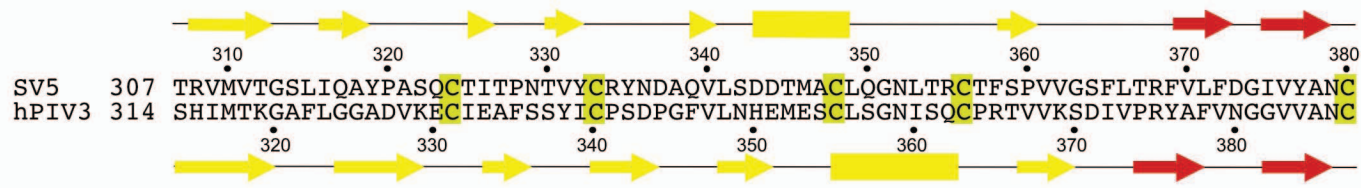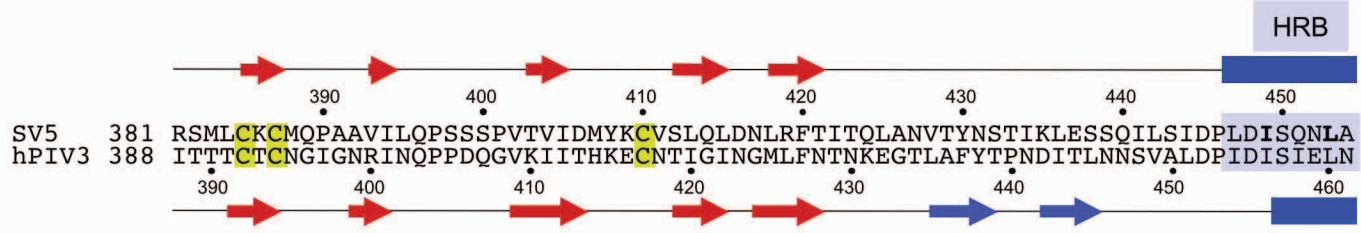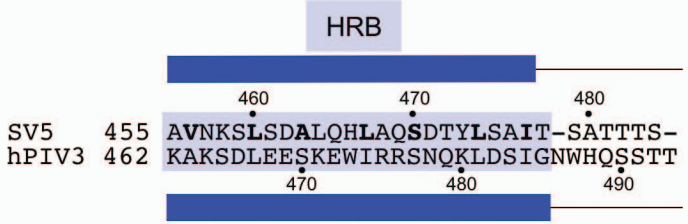

Supplement: 41586_2006_BFnature04322_MOESM2_ESM.pdf [file 41586_2006_BFnature04322_MOESM2_ESM.pdf]
